# Supplementary material for: A systematic literature review of herpes zoster incidence worldwide
Source: PubMed Central journal article supplement (PMC8115759; doi:10.1080/21645515.2020.1847582), 2021-03-02
Supplement: KHVI_A_1847582_SM1670.pdf [file KHVI_A_1847582_SM1670.pdf]

## SUPPLEMENTARY MATERIAL

**Supplementary Table 1: Search strategy**

| Database                | Strategy                                                                                                                                                                                                                                                                                                                                                                                  | No. of publications |
|-------------------------|-------------------------------------------------------------------------------------------------------------------------------------------------------------------------------------------------------------------------------------------------------------------------------------------------------------------------------------------------------------------------------------------|---------------------|
| Medline<br>(via PubMed) | <p><i>#1 Herpes Zoster</i></p> <p>“Herpes Zoster”[Mesh] OR zoster[tiab] OR shingle*[ti,ab]</p> <p><i>#2 Incidence</i></p> <p>“Incidence”[Mesh] OR inciden*[ti,ab]</p> <p>Limits<br/>Publication date from 01-01-2002.</p>                                                                                                                                                                 | 1,349               |
| Embase                  | <p><i>#1 Herpes Zoster</i></p> <p>‘Herpes Zoster’/exp OR zoster:ti,ab OR shingle*:ti,ab</p> <p><i>#2 Incidence</i></p> <p>‘incidence’/exp OR inciden*:ti,ab</p> <p>Limits<br/>Publication date from 01-01-2002.</p> <p>Publication type: article, article in press, review (this is applied in Embase to avoid a lot of articles of non-pertinent type, such as conference abstracts)</p> | 2,128               |
| VHL                     | <p><i>#1 Herpes Zoster</i></p> <p>(mh:(herpes zoster)) OR (ti:(zoster)) OR (ab:(zoster)) OR (ti:(shingle*)) OR (ab:(shingle*))</p> <p><i>#2 Incidence</i></p> <p>(mh:(incidence)) OR (ti:(inciden*)) OR (ab:(inciden*))</p> <p>Limits<br/>Publication date from 01-01-2002.</p>                                                                                                           | 1,371               |

**Supplementary Table 2: Inclusion and exclusion criteria**

|              | <b>Inclusion criteria</b>                                                                                                                                                                                                                                                                           | <b>Exclusion criteria</b>                                                                                                                                                                                                                                                                                                                                                                                                                            |
|--------------|-----------------------------------------------------------------------------------------------------------------------------------------------------------------------------------------------------------------------------------------------------------------------------------------------------|------------------------------------------------------------------------------------------------------------------------------------------------------------------------------------------------------------------------------------------------------------------------------------------------------------------------------------------------------------------------------------------------------------------------------------------------------|
| Population   | <ul style="list-style-type: none"> <li>• Studies in persons <math>\geq 50</math> YOA</li> </ul>                                                                                                                                                                                                     | <ul style="list-style-type: none"> <li>• All other age groups</li> <li>• Non-representative population (e.g. military personnel)</li> </ul>                                                                                                                                                                                                                                                                                                          |
| Intervention | <ul style="list-style-type: none"> <li>• Not limited by intervention</li> </ul>                                                                                                                                                                                                                     | <ul style="list-style-type: none"> <li>• NA</li> </ul>                                                                                                                                                                                                                                                                                                                                                                                               |
| Comparator   | <ul style="list-style-type: none"> <li>• Not limited by comparator</li> </ul>                                                                                                                                                                                                                       | <ul style="list-style-type: none"> <li>• NA</li> </ul>                                                                                                                                                                                                                                                                                                                                                                                               |
| Outcome      | <ul style="list-style-type: none"> <li>• Incidence of HZ</li> </ul>                                                                                                                                                                                                                                 | <ul style="list-style-type: none"> <li>• HZ incidence in patients with another condition (e.g. immunocompromised persons). In case a study compared the incidence in a population with and without a certain condition, the full-text was checked to see whether an overall incidence could be calculated for both groups combined.</li> <li>• All other topics besides incidence</li> </ul>                                                         |
| Study design | <ul style="list-style-type: none"> <li>• Primary peer-reviewed research               <ul style="list-style-type: none"> <li>○ Observational studies (e.g. cohort studies, case-control studies, pre-/post-vaccine introduction time series)</li> <li>○ Surveillance studies</li> </ul> </li> </ul> | <ul style="list-style-type: none"> <li>• Non-primary research               <ul style="list-style-type: none"> <li>○ Systematic reviews*</li> <li>○ Meta-analyses*</li> <li>○ Narrative reviews (without methods)</li> <li>○ Public health programs or recommendations</li> <li>○ Transmission modeling studies</li> <li>○ Cost-effectiveness or health economics studies</li> </ul> </li> <li>• Case reports</li> <li>• Letter to editor</li> </ul> |

|                  |                                                     |                                                                                                                                                                                                                                                        |
|------------------|-----------------------------------------------------|--------------------------------------------------------------------------------------------------------------------------------------------------------------------------------------------------------------------------------------------------------|
|                  |                                                     | <ul style="list-style-type: none"> <li>• Newspaper</li> <li>• Editorial</li> <li>• Comment</li> <li>• Opinion paper</li> <li>• Phase II/III trials</li> <li>• Molecular studies</li> <li>• Studies with insufficient methodological details</li> </ul> |
| <b>Limits</b>    |                                                     |                                                                                                                                                                                                                                                        |
| Publication date | January 2002 – December 2018                        | Articles published outside of dates considered eligible for inclusion                                                                                                                                                                                  |
| Geographic scope | Worldwide                                           | None                                                                                                                                                                                                                                                   |
| Language         | English, German, Dutch, French, Spanish and Italian | Articles published in any other language besides those considered eligible for inclusion                                                                                                                                                               |

HZ, herpes zoster; NA, not applicable; YOA, years of age.

\*References of included articles in these systematic reviews/meta-analyses were manually screened for additional relevant original articles (as deemed necessary by the reviewer).

### Supplementary Table 3: Quality assessment tool

**Q1. Are the individuals captured in the study setting likely to be representative of the target population?**

- *Yes: Study is representative of a broad population (e.g. regional vs. country level, age groups, health care setting, socio-demographic status).*

*Representative healthcare setting:*

- *General practice-based records*
- *Health insurance database*

- *No: Study sample is not representative of a broad population. No representative healthcare setting:*

- *Hospital-based records*
- *Population-based screening*
- *Pharmacy database*
- *Reports from clinical practice (this is when they just report what they think they remember seeing but do not get all cases from general practice-based records)*

**Q2. Is there a valid case definition for the diagnosis of herpes zosterHZ patients?**

- *Yes: A valid method was used to define a case of HZ within the study.*
- *ICD codes with chart/laboratory review confirmation*
  - *ICD codes only*
  - *Clinical diagnosis but with PCR confirmation*

➤ *No: Unclear or no valid method was used to define HZ.*

- *ICD codes AND antiviral prescriptions*
- *ICD codes OR antiviral prescriptions*
- *Antiviral prescriptions only*
- *Self-reported diagnosis*
- *Clinical diagnosis, without stating this comes from medical records*
- *No clear description of case definition*

**Q3. Is the denominator properly defined to calculate HZ incidence?**

- *Yes: Denominator to calculate HZ incidence (per person-time at risk or per study population at risk) calculated appropriately.*
- *No: Denominator either not clearly defined or calculated inaccurately.*

ICD, International Classification of Diseases; HZ, herpes zoster; PCR, polymerase chain reaction.

**Supplementary Table 4: HZ incidence in the general population by age**

| <b>Age group</b> | <b>Cumulative incidence (no. of HZ cases per 1,000 population)<br/>Range (no. of studies)</b> | <b>Incidence rate (no. of HZ cases per 1,000 person-years)<br/>Range (no. of studies)</b> |
|------------------|-----------------------------------------------------------------------------------------------|-------------------------------------------------------------------------------------------|
| ≥45 years        | 2.54 (1 study) <sup>69</sup>                                                                  | 8.2 (1 study) <sup>62</sup>                                                               |
| 45-54 years      | 2.36-6.56 (3 studies) <sup>21, 26, 71</sup>                                                   | 3.6-4.44 (2 studies) <sup>49, 78</sup>                                                    |
| 50-54 years      | 3.79-6.9 (6 studies) <sup>30, 40, 43, 55, 70, 75</sup>                                        | 2.5-6.2 (6 studies) <sup>29, 36, 41, 68, 74, 76</sup>                                     |
| 55-59 years      | 4.56-7.76 (6 studies) <sup>30, 40, 43, 55, 70, 75</sup>                                       | 3.2-7.46 (6 studies) <sup>29, 36, 41, 68, 74, 76</sup>                                    |
| 50-59 years      | 1.72-17.4 (15 studies) <sup>26, 28, 31, 32, 47, 53, 58, 60, 63-66, 72, 73, 81</sup>           | 2.44-6.07 (11 studies) <sup>6, 15, 17, 18, 22-24, 42, 44, 46, 56</sup>                    |
| ≥60 years        | 6.18-16.21 (4 studies) <sup>48, 58, 63, 73</sup>                                              | 7.6-10.46 (2 studies) <sup>17, 33</sup>                                                   |
| 45-64 years      | 1.15-7.42 (4 studies) <sup>25, 34, 54, 69</sup>                                               | -                                                                                         |
| 50-64 years      | 3.55-9.98 (2 studies) <sup>19, 61</sup>                                                       | -                                                                                         |
| 55-64 years      | 4.09-8.29 (3 studies) <sup>21, 26, 71</sup>                                                   | 5.8-7.48 (2 studies) <sup>49, 78</sup>                                                    |
| 60-64 years      | 4.12-9.6 (8 studies) <sup>19, 30, 40, 43, 52, 55, 70, 75</sup>                                | 3.9-9.71 (8 studies) <sup>23, 29, 36, 41, 44, 68, 74, 76</sup>                            |
| ≥65 years        | 3.98-20.03 (9 studies) <sup>14, 21, 25-27, 34, 50, 52, 69</sup>                               | 7.89-15.23 (6 studies) <sup>15, 16, 20, 23, 37, 78</sup>                                  |
| 65-69 years      | 6.1-10.85 (6 studies) <sup>30, 40, 43, 55, 70, 75</sup>                                       | 5.5-12.73 (9 studies) <sup>16, 20, 29, 36, 37, 41, 68, 74, 76</sup>                       |
| 60-69 years      | 2.43-22.4 (15 studies) <sup>26, 28, 31, 32, 47, 53, 58, 60, 63-66, 72, 73, 81</sup>           | 4.62-9.41 (10 studies) <sup>6, 15, 17, 18, 22, 24, 33, 42, 46, 56</sup>                   |
| ≥70 years        | 3.8-11.77 (5 studies) <sup>26, 53, 60, 66, 79</sup>                                           | -                                                                                         |
| 65-74 years      | 2.45-15 (5 studies) <sup>14, 54, 61, 69, 71</sup>                                             | 6.5-12.63 (3 studies) <sup>44, 49, 78</sup>                                               |
| 70-74 years      | 7.12-12.3 (6 studies) <sup>30, 40, 43, 55, 70, 75</sup>                                       | 6.34-14.2 (10 studies) <sup>16, 20, 29, 33, 36, 37, 41, 68, 74, 76</sup>                  |
| ≥75 years        | 5.78-25 (4 studies) <sup>14, 54, 55, 69</sup>                                                 | 9.1-12.97 (2 studies) <sup>29, 49</sup>                                                   |
| 75-79 years      | 7.28-12.4 (5 studies) <sup>30, 40, 43, 70, 75</sup>                                           | 7.09-15.95 (9 studies) <sup>16, 20, 33, 36, 37, 41, 68, 74, 76</sup>                      |
| 70-79 years      | 3.2-21.8 (13 studies) <sup>28, 31, 32, 45, 47, 58, 60, 63-65, 72, 73, 81</sup>                | 7.13-12.12 (9 studies) <sup>6, 17, 18, 22, 24, 38, 42, 46, 56</sup>                       |
| ≥80 years        | 6.09-19.89 (11 studies) <sup>28, 32, 40, 58, 60, 63-65, 72, 73, 81</sup>                      | 7.95-13.67 (13 studies) <sup>6, 17, 18, 20, 22, 24, 41, 42, 46, 56, 59, 62, 76</sup>      |
| 75-84 years      | 9.85-13.52 (2 studies) <sup>61, 71</sup>                                                      | 9.9-11.45 (2 studies) <sup>33, 78</sup>                                                   |
| 80-84 years      | 7.67 -12.65 (4 studies) <sup>30, 43, 70, 75</sup>                                             | 7.29-18.5 (5 studies) <sup>16, 36, 37, 68, 74</sup>                                       |
| 85-89 years      | 12.05-13.23 (2 studies) <sup>30, 43</sup>                                                     | 9.0-18.4 (1 study) <sup>74</sup>                                                          |
| 80-89 years      | 6.93-13.76 (2 studies) <sup>31, 47</sup>                                                      | 9.9-12.8 (2 studies) <sup>33, 74</sup>                                                    |
| ≥85 years        | 5.85-12.41 (3 studies) <sup>61, 70, 75</sup>                                                  | 5.59-16.90 (5 studies) <sup>16, 36, 37, 68, 78</sup>                                      |
| ≥90 years        | 5.37-15.27 (4 studies) <sup>30, 31, 43, 47</sup>                                              | 6.8-12.9 (1 study) <sup>74</sup>                                                          |
| 85-94 years      | 10.77 (1 study) <sup>71</sup>                                                                 | -                                                                                         |
| 90-94 years      | -                                                                                             | 11.9 (1 study) <sup>74</sup>                                                              |

|                                       |                                                                 |                             |
|---------------------------------------|-----------------------------------------------------------------|-----------------------------|
| ≥95 years                             | 9.45-14.37 (2 studies) <sup>71, 77</sup>                        | 4.7 (1 study) <sup>74</sup> |
| Per year from 50 years until 94 years | 2.15 (50 years) – 8.44 years (94 years) (1 study) <sup>77</sup> | -                           |

HZ, herpes zoster

**Supplementary Table 5: Quality assessment results (N=69)**

| Reference                            | Are the individuals captured in the study setting likely to be representative of the target population? | Is there a valid case definition for the diagnosis of herpes zoster patients? | Is the denominator properly defined to calculate HZ incidence? |
|--------------------------------------|---------------------------------------------------------------------------------------------------------|-------------------------------------------------------------------------------|----------------------------------------------------------------|
| Albrecht, 2015 <sup>80</sup>         | No                                                                                                      | Yes                                                                           | Yes                                                            |
| Alicino, 2017 <sup>68</sup>          | No                                                                                                      | No                                                                            | No                                                             |
| Amirthalingam, 2018 <sup>33</sup>    | Yes                                                                                                     | Yes                                                                           | Yes                                                            |
| Brisson, 2003 <sup>34</sup>          | No                                                                                                      | No                                                                            | Yes                                                            |
| Cebrian-Cuenca, 2010 <sup>53</sup>   | No                                                                                                      | No                                                                            | Yes                                                            |
| Chao, 2011 <sup>58</sup>             | Yes                                                                                                     | Yes                                                                           | Yes                                                            |
| Chaves, 2007 <sup>14</sup>           | No                                                                                                      | No                                                                            | Yes                                                            |
| Chen, 2014 <sup>15</sup>             | Yes                                                                                                     | Yes                                                                           | Yes                                                            |
| Di Legami, 2007 <sup>69</sup>        | No                                                                                                      | No                                                                            | Yes                                                            |
| Edgar, 2007 <sup>27</sup>            | No                                                                                                      | Yes                                                                           | Yes                                                            |
| Esteban-Vasallo, 2014 <sup>54</sup>  | No                                                                                                      | Yes                                                                           | Yes                                                            |
| Fleming, 2004 <sup>35</sup>          | No                                                                                                      | No                                                                            | Yes                                                            |
| Garcia-Cenoz, 2008 <sup>55</sup>     | No                                                                                                      | Yes                                                                           | Yes                                                            |
| Gauthier, 2009 <sup>36</sup>         | Yes                                                                                                     | Yes                                                                           | Yes                                                            |
| Gialloreti, 2010 <sup>70</sup>       | No                                                                                                      | Yes                                                                           | Yes                                                            |
| Gonzalez Chiappe, 2010 <sup>71</sup> | No                                                                                                      | No                                                                            | Yes                                                            |
| Hales, 2013 <sup>16</sup>            | Yes                                                                                                     | Yes                                                                           | Yes                                                            |
| Harpaz, 2018 <sup>26</sup>           | Yes                                                                                                     | Yes                                                                           | Yes                                                            |
| Hillebrand, 2015 <sup>39</sup>       | Yes                                                                                                     | Yes                                                                           | Yes                                                            |
| Imafuku, 2018 <sup>44</sup>          | Yes                                                                                                     | No                                                                            | Yes                                                            |
| Insinga, 2005 <sup>6</sup>           | Yes                                                                                                     | Yes                                                                           | Yes                                                            |
| Jain, 2018 <sup>37</sup>             | Yes                                                                                                     | Yes                                                                           | Yes                                                            |



|                                         |       |       |     |
|-----------------------------------------|-------|-------|-----|
| Jih, 2009 <sup>59</sup>                 | Yes   | Yes   | Yes |
| Johnson, 2015 <sup>17</sup>             | Yes   | Yes   | Yes |
| Kawai, 2016 <sup>18</sup>               | No    | Yes   | No  |
| Kim, 2014 <sup>81</sup>                 | Yes   | Yes   | Yes |
| Krishnarajah, 2014 <sup>19</sup>        | Yes   | Yes   | Yes |
| Langan, 2013 <sup>20</sup>              | Yes   | Yes*  | Yes |
| Leung, 2011 <sup>21</sup>               | Yes   | Yes   | Yes |
| Li, 2016 <sup>65</sup>                  | No    | No    | No  |
| Lin. 2010 <sup>60</sup>                 | Yes   | Yes   | Yes |
| Liu. 2015 <sup>62</sup>                 | No    | No    | Yes |
| Lu, 2018 <sup>61</sup>                  | Yes   | Yes   | Yes |
| Lu, 2018 <sup>66</sup>                  | No    | No    | Yes |
| MacIntyre, 2015 <sup>63</sup>           | Yes** | Yes** | Yes |
| MacIntyre-PBS 2015                      | No    | No    | Yes |
| Marra, 2016 <sup>28</sup>               | No    | Yes   | Yes |
| McDonald, 2017 <sup>29</sup>            | No    | Yes   | Yes |
| Mick, 2010 <sup>72</sup>                | No    | Yes   | Yes |
| Morant-Talamante,<br>2013 <sup>56</sup> | No    | Yes   | Yes |
| Mullooly, 2005 <sup>22</sup>            | No    | Yes   | No  |
| Muñoz-Quiles, 2017 <sup>57</sup>        | No    | Yes   | Yes |
| Nilsson, 2015 <sup>75</sup>             | No    | No    | Yes |
| Opstelten, 2002 <sup>49</sup>           | Yes   | Yes   | No  |
| Opstelten, 2005 <sup>50</sup>           | Yes   | Yes   | Yes |
| Opstelten, 2006 <sup>51</sup>           | Yes   | Yes   | Yes |
| Pierik, 2012 <sup>52</sup>              | No    | Yes   | Yes |
| Reid, 2014 <sup>73</sup>                | No    | No    | Yes |
| Rimseliene, 2016 <sup>79</sup>          | Yes   | Yes   | Yes |
| Russel, 2007 <sup>31</sup>              | No    | Yes   | Yes |

|                                    |      |      |     |
|------------------------------------|------|------|-----|
| Russel, 2014 <sup>30</sup>         | No   | Yes  | Yes |
| Schiffner-Rohe, 2010 <sup>40</sup> | No   | Yes  | Yes |
| Schmidt, 2017 <sup>77</sup>        | No   | No   | Yes |
| Schmidt-Ott, 2018 <sup>41</sup>    | No   | No   | No  |
| Shiraki, 2017 <sup>45</sup>        | No   | Yes  | Yes |
| Stein, 2009 <sup>64</sup>          | Yes  | Yes  | Yes |
| Stein-PBS 2009                     | No** | No** | Yes |
| Suaya, 2014 <sup>23</sup>          | Yes  | Yes  | Yes |
| Sundström, 2015 <sup>76</sup>      | No   | Yes  | No  |
| Takao, 2015 <sup>46</sup>          | No   | Yes  | Yes |
| Tanuseputro, 2011 <sup>32</sup>    | No   | Yes  | Yes |
| Toyama, 2018 <sup>48</sup>         | No   | No   | Yes |
| Toyama, 2009 <sup>47</sup>         | No   | No   | Yes |
| Turner, 2018 <sup>74</sup>         | No   | No   | No  |
| Ultsch, 2011 <sup>43</sup>         | Yes  | Yes  | Yes |
| Ultsch, 2013 <sup>42</sup>         | No   | Yes  | Yes |
| Walker, 2018 <sup>38</sup>         | Yes  | Yes  | Yes |
| Weitzman, 2013 <sup>78</sup>       | Yes  | Yes  | No  |
| Yawn, 2007 <sup>24</sup>           | No   | Yes  | No  |
| Yih, 2005 <sup>25</sup>            | No   | No   | Yes |
| Zhu, 2015 <sup>67</sup>            | No   | No   | No  |

\* For the other case definition based on drug prescription, this entry was assigned as “No”.

\*\* For the dataset (based on PBS), this entry was assigned as “No”.

**Supplementary Figure 1: Cumulative HZ incidence from individual studies (N=69)**

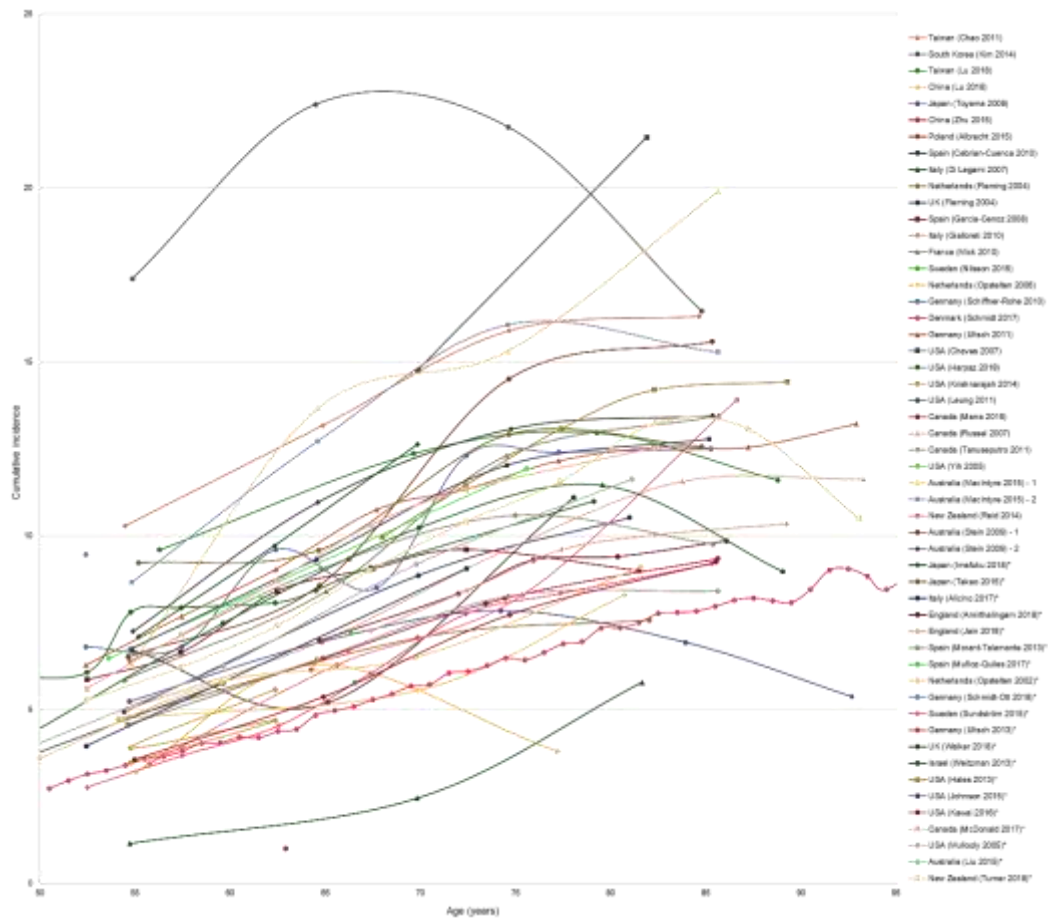

\*Incidence rate (number of HZ cases per 1,000 person-years) converted to cumulative incidence (number of HZ cases per 1,000 population)  
 HZ, herpes zoster
